# Supplementary material for: Tissue proteome analysis for profiling proteins associated with lymph node metastasis in gallbladder cancer
Source: BMC Cancer. 2023 May 4;23:402. doi: 10.1186/s12885-023-10840-3 (PMC10161508; doi:10.1186/s12885-023-10840-3)
Supplement: Supplementary file 1 — Additional file 1: Supplementary Table S1. Clinical parameters of patients such as age, gender, TNM, stage, grade, white cell count, liver enzymes (AST/ ALT/ ALP), bilirubin and co-morbidities (jaundice, pulmonary tuberculosis, asthma, diabetes melitus, hypertension (HTN), loss of appetite(LOA) and LOW- Loss of weight; Foot note: NA- Not applicable, (-) Not available. Supplementary Table S2. List of 58 DEPs in LN Positive GBC. The proteins with ≥2.0 fold change and adjusted p value <0.05 were used as DEPs. The details are provided in the Methods section. The Table describes the total number of proteins and peptides identified in mass spectrometry runs along with their quantity values. Supplementary Table S3. Bioinformatic analysis of 58 DEPs in LN positive GBC using STRING databse. (A) Top 10 Molecular Functions (B) Top 10 reactome pathways. Supplementary Table S4. Literature survey of 58 DEPs for their association with LN metastasis in cancer. A total of 6 proteins are reported in GBC, 33 proteins in other cancers and 19 were found to be novel to cancer with respect to LN metastasis. [file 12885_2023_10840_MOESM1_ESM.xlsx]

## Sheet: Supplementary Table S1
Supplementary Table S1: Clinical parameters of patients such as white cell count, liver enzymes (AST/ ALT/ ALP), bilirubin and co-morbidities (jaundice, pulmonary tuberculosis, asthma, diabetes melitus, hypertension (HTN), loss of appetite(LOA) and loss of weight (LOW), thyroid disease)
Supplementary Table S1: Clinical parameters of patients such as age, gender, TNM, stage, grade, white cell count, liver enzymes (AST/ ALT/ ALP), bilirubin and co-morbidities (jaundice, pulmonary tuberculosis, asthma, diabetes melitus, hypertension (HTN), loss of appetite(LOA) and LOW- Loss of weight; Foot note: NA- Not applicable, (-) Not available
S.No.	Patient code	Sex	Age	Group	TNM	Stage	Grade	Gallstone	TLC	DLC	Bilirubin	AST	ALT	ALP	Jaundice	Co-morbidities	Experiment (Discovery/ Verification)
1	GBC1	Female	48	GBC	pT3N0M0	IIIA	MDAC	Absent	5100	72/22	0.4	43	18	148	No	Yes(DM , asthma on inhaler)	Discovery & Verification
2	GBC2	Female	42	GBC	pT3N0M0	IIIA	MDAC	Absent	-	-	-	-	-	-	-	-	Discovery & Verification
3	GBC3	Female	57	GBC	pT3N0M0	IIIA	MDAC	Absent	4900	64/24	0.3	22	14	NA	No	Yes (LOA)	Discovery & Verification
4	GBC4	Female	62	GBC	pT2aN1M0	IIIB	MDAC	Present	7600	72/20	1	20	22	126	No	Yes (HTN)	Discovery & Verification
5	GBC5	Female	54	GBC	pT3N1M0	IIIB	MDAC	Absent	12300	70/24	10.8	138	81	324	YES (2.5 months)	No	Discovery & Verification
6	GBC6	Female	40	GBC	pT3N1M0	IIIB	MDAC	Present	-	-	-	-	-	-	-	-	Discovery & Verification
7	GBC7	Female	63	GBC	pT2bN1M0	IIIB	MDAC	Absent	-	-	-	-	-	-	-	-	Discovery & Verification
8	GBC8	Female	49	GBC	pT3N0M0	IIIA	MDAC	Present	8000	76/12	0.7	34	25	126	No	Yes(LOA, LOW)	Verification only
9	GBC9	Female	40	GBC	pT3N0M0	IIIA	MDAC	Present	15500	94/4	2.4	123	203	90	No	Yes (LOA, LOW)	Verification only
10	GBC10	Female	45	GBC	pT3N0M0	IIIA	MDAC	Absent	13200	73/18	3.8	82	47	646	No	No	Verification only
11	GBC11	Female	74	GBC	pT3N0M0	IIIA	MDAC	Present	8900	87/9	2.4	69	29	92	No	Yes(LOA,LOW)	Verification only
12	GBC12	Female	40	GBC	pT3N0M0	IIIA	MDAC	Absent	4100	67/19	4.4	69	64	334	No	No	Verification only
13	GBC13	Male	55	GBC	pT3N0M0	IIIA	MDAC	-	-	-	-	-	-	-	-	-	Verification only
14	GBC14	Female	50	GBC	pT3N0M0	IIIA	MDAC	-	-	-	-	-	-	-	-	-	Verification only
15	GBC15	Female	57	GBC	pT2bN1M0	IIIB	WDAC	Absent	19600	90/06	0.2	131	151	104	No	Yes (LOA, LOW)	Verification only
16	GBC16	Female	72	GBC	pT3N1M0	IIIB	MDAC	-	-	-	-	-	-	-	-	-	Verification only
17	GBC17	Female	48	GBC	pT2bN1M0	IIIB	MDAC	Present	7500	55/30	0.3	25	25	100	No	Yes (LOW)	Verification only
18	GBC18	Female	47	GBC	pT2bN1M0	IIIB	PDAC	Present	7900	64/29	0.6	25	44	412	No	No	Verification only
19	GBC19	Female	55	GBC	pT3N1M0	IIIB	MDAC	Absent	9600	65/25	0.3	29	14	102	No	No	Verification only
20	GBC20	Male	65	GBC	pT3N1M0	IIIB	MDAC	-	-	-	-	-	-	-	-	-	Verification only
21	GBC21	Female	61	GBC	pT3N1M0	IIIB	PDAC	Present	3900	58/30	0.7	102	73	675	No	No	Verification only
22	GBC22	Female	65	GBC	pT2aN1M0	IIIB	MDAC	-	-	-	-	-	-	-	-	-	Verification only
23	GBC23	Female	61	GBC	pT4N2M0	IVB	MDAC	Present	4600	64/27	0.5	56	56	112	No	No	Verification only
24	GBC24	Male	38	GBC	pT3N2M0	IVB	PDAC	Absent	13700	90/6	1.5	215	127	62	No	No	Verification only
25	GBC25	Female	66	GBC	pT4N1M0	IVA	MDAC	Absent	13700	89/9	1.1	189	169	276	No	No	Verification only
26	GBC26	Female	35	GBC	pT2N0M0	II	MDAC	-	-	-	-	-	-	-	-	-	Verification only
27	GBC27	Female	48	GBC	pT2N0M0	II	MDAC	Absent	18000	93/3	0.4	94	108	126	No	No	Verification only
28	GBC28	Female	47	GBC	pT2aN0M0	II	MDAC	Present	11700	82/09	0.5	38	31	169	No	No	Verification only
29	GBC29	Female	86	GBC	pT2aN0M0	II	MDAC	Present	8400	78/15	0.5	84	54	162	No	No	Verification only
30	GBC30	Female	67	GBC	pT2bN0M0	II	MDAC	Present	8700	65/28	0.4	26	22	174	No	No	Verification only
31	GSD1	Female	56	GSD	NA	NA	NA	Present	9700	59/32	0.6	24	19	74	No	YES {DM since 1 and half years (taking tab metformin 500mg)}	Discovery & Verification
32	GSD2	Female	45	GSD	NA	NA	NA	Present	-	-	-	-	-	-	-	-	Discovery & Verification
33	GSD3	Female	42	GSD	NA	NA	NA	Present	-	-	-	-	-	-	-	-	Discovery & Verification
34	GSD4	Female	47	GSD	NA	NA	NA	Present	-	-	-	-	-	-	-	-	Discovery & Verification
35	GSD5	Female	45	GSD	NA	NA	NA	Present	-	-	-	-	-	-	-	-
36	GSD6	Female	40	GSD	NA	NA	NA	Present	6600	40/48	0.3	23	24	177	No	No	Verification only
37	GSD7	Female	55	GSD	NA	NA	NA	Present	9500	75/18	0.3	22	27	82	No	No	Verification only
38	GSD8	Female	24	GSD	NA	NA	NA	Present	9400	72/19	0.2	17	21	93	No	No	Verification only
39	GSD9	Female	32	GSD	NA	NA	NA	Present	6800	90/07	-	-	-	-	Yes	No	Verification only
40	GSD10	Female	45	GSD	NA	NA	NA	Present	-	-	-	-	-	-	-	-	Verification only
41	GSD11	Male	22	GSD	NA	NA	NA	Present	7600	64/25	1.2	45	49	119	No	No	Verification only
42	GSD12	Female	50	GSD	NA	NA	NA	Present	7300	56/37	0.5	16	10	111	No	No	Verification only
43	GSD13	Male	34	GSD	NA	NA	NA	Present	9700	60/30	0.9	51	101	70	No	No	Verification only
44	GSD14	Female	50	GSD	NA	NA	NA	Present	7700	70/25	0.2	27	20	113	No	No	Verification only
45	GSD15	Female	25	GSD	NA	NA	NA	Present	6800	54/36	0.4	29	26	138	No	No	Verification only

## Sheet: Supplementary Table S2
Supplementary Table S2: List of 58 DEPs in LN Positive GBC. The proteins with ≥2.0 fold change and adjusted p value <0.05 were used as DEPs. The details are provided in the Methods section. The Table describes the total number of proteins and peptides identified in mass spectrometry runs along with their quantity values.
Protein FDR Confidence: Combined	Accession	Gene Symbol	Description	Coverage [%]	#PSMs	# Unique Peptides	# AAs	MW [kDa]	calc. pI	Score Sequest HT: Sequest HT	# Peptides (by Search Engine): Sequest HT	Fold change: GBC-1	Fold change: GBC-2	Fold change: GBC-3	Fold change: GBC-4	Fold change: GBC-5	Fold change: GBC-6	Fold change: GBC-7	Adj. P-Value: GBC-1	Adj. P-Value: GBC-2	Adj. P-Value: GBC-3	Adj. P-Value: GBC-4	Adj. P-Value: GBC-5	Adj. P-Value: GBC-6	Adj. P-Value: GBC-7	Variability [%]: GBC-1	Variability [%]: GBC-2	Variability [%]: GBC-3	Variability [%]: GBC-4	Variability [%]: GBC-5	Variability [%]: GBC-6	Variability [%]: GBC-7	Abundances (Grouped): GSD	Abundances (Grouped): GBC-1	Abundances (Grouped): GBC-2	Abundances (Grouped): GBC-3	Abundances (Grouped): GBC-4	Abundances (Grouped): GBC-5	Abundances (Grouped): GBC-6	Abundances (Grouped): GBC-7	Abundances (Grouped) CV [%]: GSD	Abundances (Grouped) CV [%]: GBC-1	Abundances (Grouped) CV [%]: GBC-2	Abundances (Grouped) CV [%]: GBC-3	Abundances (Grouped) CV [%]: GBC-4	Abundances (Grouped) CV [%]: GBC-5	Abundances (Grouped) CV [%]: GBC-6	Abundances (Grouped) CV [%]: GBC-7	Abundances (by Rep.): GSD, R1
High	NP_000413.1	KRT17	NP_000413.1#KRT17#3872#keratin, type I cytoskeletal 17 [Homo sapiens]	15	28	2	432	48.1	5.02	110.92	7	1.088	0.765	1.091	0.827	1.556	4.911	7.18	0.702498	0.984198	0.508101	0.158436	0.181461	0.0474186	0.0287255	9.68	7.2	24.09	11.03	15.46	15.56	11.13	42.3	48.9	32.4	56.7	40.4	67.1	208	304.1	32.39	15.04	116.76	20.87	26.31	8.48	25.94	27.71	40.4
	NP_000413.1
	NP_000413.1
High	NP_005547.3	KRT7	NP_005547.3#KRT7#3855#keratin, type II cytoskeletal 7 [Homo sapiens]	29	46	9	469	51.4	5.48	190.63	12	0.878	0.72	0.963	2.651	1.944	2.497	0.82	0.219199	0.0193417	0.835598	0.00982187	0.0274014	0.0125729	0.110042	9.73	4.3	22.29	13.48	26.01	23.77	2.72	68.1	65.8	50.1	65.5	191.1	132.4	176.4	50.6	16.13	18.85	8.72	32.83	11.65	7.62	8.01	14.06	82.4
	NP_005547.3
	NP_005547.3
	NP_005547.3
	NP_005547.3
	NP_005547.3
	NP_005547.3
	NP_005547.3
	NP_005547.3
	NP_005547.3
High	NP_001341935.1	NPM1	NP_001341935.1#NPM1#4869#nucleophosmin isoform 1 [Homo sapiens]#NP_002511.1#NPM1#4869#nucleophosmin isoform 1 [Homo sapiens]	16	27	3	294	32.6	4.78	173.03	3	0.72	1.224	1.131	3.362	1.725	0.835	2.93	0.0552125	0.0234367	0.22527	0.0045509	0.011362	0.114881	0.0043711	10.39	5.01	9.72	7.42	4.19	5.97	3.48	61.6	45.3	74.4	69.7	211.6	106.7	47.2	183.5	9.12	20.1	4.34	7.78	5.76	2.96	13.81	2.42	52.6
	NP_001341935.1
	NP_001341935.1
	NP_001341935.1
	NP_001341935.1
	NP_001341935.1
High	NP_001264153.1	TAGLN2	NP_001264153.1#TAGLN2#8407#transgelin-2 isoform a [Homo sapiens]	12	15	2	220	24.4	8.25	83.6	2	0.566	0.535	0.634	0.965	1.624	1.629	2.082	0.00686041	0.00605718	0.0292593	0.234852	0.00109735	0.00337292	0.00354146	2.33	2.5	4.28	4.82	1.71	1.55	6.86	89	49.7	48.1	55.9	85.4	144.2	145.1	182.7	1.57	8.53	6.94	14.5	2.75	0.31	2.15	5.77	88.5
	NP_001264153.1
	NP_001264153.1
	NP_001264153.1
High	XP_006717563.1	VIM	XP_006717563.1#VIM#7431#vimentin isoform X1 [Homo sapiens]#NP_003371.2#VIM#7431#vimentin [Homo sapiens]	39	104	16	466	53.6	5.12	413.59	19	0.686	0.522	0.685	0.387	0.863	1.376	1.479	0.0279332	0.00445063	0.0400685	0.00372669	0.00877065	0.00705162	0.000149169	2.97	1.3	8.75	0.83	0.64	1.51	0.11	114.5	78.5	58.7	77.5	44.6	98.3	158.6	169.4	1.98	9.87	6.16	13.39	6.55	3.78	5.17	1.83	115.3
	XP_006717563.1
	XP_006717563.1
	XP_006717563.1
	XP_006717563.1
	XP_006717563.1
	XP_006717563.1
	XP_006717563.1
	XP_006717563.1
	XP_006717563.1
	XP_006717563.1
	XP_006717563.1
	XP_006717563.1
	XP_006717563.1
	XP_006717563.1
	XP_006717563.1
	XP_006717563.1
	XP_006717563.1
	XP_006717563.1
	XP_006717563.1
	XP_006717563.1
	XP_006717563.1
High	NP_001231178.1	APEX1	NP_001231178.1#APEX1#328#DNA-(apurinic or apyrimidinic site) lyase [Homo sapiens]#NP_542379.1#APEX1#328#DNA-(apurinic or apyrimidinic site) lyase [Homo sapiens]#NP_001632.2#APEX1#328#DNA-(apurinic or apyrimidinic site) lyase [Homo sapiens]#NP_542380.1#APEX1#328#DNA-(apurinic or apyrimidinic site) lyase [Homo sapiens]	17	13	4	318	35.5	8.12	59.86	4	1.372	0.688	1.223	2.057	1.462	1.311	1.311	0.101473	0.0457113	0.0566853	0.0450292	0.0845933	0.104934	0.157367	20.11	0.59	4.04	25.07	18.86	10.78	20.91	74.7	114	54.6	93.8	153.6	109.1	102.4	97.9	14.85	24.71	8.51	19.27	16.9	10.63	10.87	7.16	77.6
	NP_001231178.1
	NP_001231178.1
	NP_001231178.1
	NP_001231178.1
High	XP_011531424.1	CAPG	XP_011531424.1#CAPG#822#macrophage-capping protein isoform X1 [Homo sapiens]#XP_011531425.1#CAPG#822#macrophage-capping protein isoform X1 [Homo sapiens]#NP_001307662.1#CAPG#822#macrophage-capping protein isoform 1 [Homo sapiens]#NP_001243068.1#CAPG#822#macrophage-capping protein isoform 1 [Homo sapiens]#NP_001307661.1#CAPG#822#macrophage-capping protein isoform 1 [Homo sapiens]#NP_001738.2#CAPG#…	8	10	2	348	38.5	6.19	47.14	2	1.274	0.606	0.877	1.363	1.103	1.402	2.061	0.0494922	0.0833351	0.0710955	0.0530531	0.126849	0.0960013	0.00354146	8.23	10.05	0.77	18.34	7.95	25.58	6.55	83.9	103.6	51.2	74.4	113.6	92.2	113.6	167.7	8.35	12.57	21.86	4.32	7.59	1.69	15.02	7.77	79.6
	XP_011531424.1
	XP_011531424.1
High	NP_001924.2	DLST	NP_001924.2#DLST#1743#dihydrolipoyllysine-residue succinyltransferase component of 2-oxoglutarate dehydrogenase complex, mitochondrial isoform 1 precursor [Homo sapiens]	15	24	5	453	48.7	8.95	125.5	5	0.756	1.553	1.66	3.701	2.754	0.988	1.215	0.0239577	0.00313907	0.0154794	0.000252176	0.000927357	0.86508	0.0103827	3.15	3.52	9.83	0.88	2.4	10.83	1.41	58.5	45.3	92.2	97.1	216.1	161.6	57.9	71.3	2.6	8.15	4.06	8.97	1.68	0.56	6.41	5.18	57.1
	NP_001924.2
	NP_001924.2
	NP_001924.2
	NP_001924.2
	NP_001924.2
High	NP_001393.1	EEF1A1	NP_001393.1#EEF1A1#1915#elongation factor 1-alpha 1 [Homo sapiens]	14	9	3	462	50.1	9.01	32.67	3	0.665	1.741	1.307	2.511	1.817	0.666	3.143	0.0237337	0.00903105	0.0953929	0.00791644	0.012119	0.00633348	0.00602804	5.51	11.13	18.71	12.46	12.63	1.44	14.04	62.9	39	101.6	82.5	158.5	114.7	42.3	198.4	8.49	16.04	12.12	22.3	7.33	5.47	7.5	9.81	59.8
	NP_001393.1
	NP_001393.1
	NP_001393.1
High	XP_005252017.1	HNRNPK	XP_005252017.1#HNRNPK#3190#heterogeneous nuclear ribonucleoprotein K isoform X1 [Homo sapiens]#NP_002131.2#HNRNPK#3190#heterogeneous nuclear ribonucleoprotein K isoform a [Homo sapiens]#NP_112553.1#HNRNPK#3190#heterogeneous nuclear ribonucleoprotein K isoform a [Homo sapiens]	14	14	6	464	51	5.33	55.78	6	0.91	0.816	1.922	2.541	2.434	1.183	2.334	0.171221	0.0843873	0.0548286	0.00630563	0.000936769	0.0712762	0.00354146	8.33	4.25	30.09	1.85	2.33	1.23	8.34	60.7	54.2	47.5	119.3	157.5	147.6	73.5	139.9	5.32	8.64	15.2	25.46	16.38	3.34	7.23	4.89	59.8
	XP_005252017.1
	XP_005252017.1
	XP_005252017.1
	XP_005252017.1
	XP_005252017.1
	XP_005252017.1
High	NP_006112.3	KRT1	NP_006112.3#KRT1#3848#keratin, type II cytoskeletal 1 [Homo sapiens]	18	40	6	644	66	8.12	188.77	9	1.418	0.585	0.606	0.473	0.768	0.611	0.897	0.0269663	0.00529802	0.0318544	0.0071745	0.00504285	0.00705162	0.0144683	10.7	1.58	4.51	2.78	2.27	1.29	1.8	125.8	178.3	75.2	77.7	59.5	95.7	74.2	113.6	4.73	7.43	5.92	15.32	7.15	2.08	5.89	2.45	121.4
	NP_006112.3
	NP_006112.3
	NP_006112.3
	NP_006112.3
	NP_006112.3
	NP_006112.3
High	NP_002267.2	KRT19	NP_002267.2#KRT19#3880#keratin, type I cytoskeletal 19 [Homo sapiens]	41	119	12	400	44.1	5.14	447.32	19	1.002	0.749	1.788	7.241	3.853	2.39	0.93	0.890339	0.0762632	0.0318544	0.00683136	0.0104227	0.0157686	0.281232	7.06	11.1	19.98	14.89	15.47	15.87	5.78	41.6	43.1	32.8	82.4	299.7	158.2	101.7	40.5	21.48	21.05	6.46	10.97	7.77	5.28	5.07	13.95	59.5
	NP_002267.2
	NP_002267.2
	NP_002267.2
	NP_002267.2
	NP_002267.2
	NP_002267.2
	NP_002267.2
	NP_002267.2
	NP_002267.2
	NP_002267.2
	NP_002267.2
	NP_002267.2
	NP_002267.2
	NP_002267.2
High	NP_005545.1	KRT6A	NP_005545.1#KRT6A#3853#keratin, type II cytoskeletal 6A [Homo sapiens]	14	16	5	564	60	8	62.92	7	1.252	0.732	1.397	1.202	0.888	1.352	2.212	0.0269851	0.0255377	0.094818	0.0448449	0.225809	0.0469623	0.0118194	7.38	2.97	19.84	7.6	10.56	10.71	12.1	79.2	100.6	59.4	105.8	97.5	70	107	180.6	8.48	14.25	2.85	18.5	2.71	12.79	5.81	12.31	75.9
	NP_005545.1
	NP_005545.1
	NP_005545.1
	NP_005545.1
	NP_005545.1
High	NP_006139.1	LASP1	NP_006139.1#LASP1#3927#LIM and SH3 domain protein 1 isoform a [Homo sapiens]	14	9	3	261	29.7	7.05	34.65	3	1.531	1.045	1.107	2.971	1.467	0.881	1.703	0.739945	0.997121	0.532102	0.0279485	0.0718941	0.497892	0.0517644	32.05	3.92	12.72	18.47	14.44	38.83	17.21	69	105.7	66.9	71.2	207.6	101.2	60.8	117.5	13.24	56.11	13.65	18.77	30.29	12.42	58	17.59	52.1
	NP_006139.1
	NP_006139.1
	NP_006139.1
High	NP_573566.2	LRPPRC	NP_573566.2#LRPPRC#10128#leucine-rich PPR motif-containing protein, mitochondrial precursor [Homo sapiens]	5	11	5	1394	157.8	6.13	39.83	5	1.312	0.659	1.544	3.315	2.019	0.905	1.217	0.0794898	0.0457598	0.165548	0.0158995	0.039528	0.530783	0.221326	15.03	3.05	41.98	27.45	23.04	10.79	14.82	65.3	90.4	48.5	99.4	214	130	65.2	87.1	21.06	11.12	12.62	13.62	14.89	6.56	23.21	17.7	85.1
	NP_573566.2
	NP_573566.2
	NP_573566.2
	NP_573566.2
	NP_573566.2
High	XP_011529873.1	ANXA10	XP_011529873.1#ANXA10#11199#annexin A10 isoform X1 [Homo sapiens]	15	15	4	344	39.4	5.33	69.29	4	0.886	1.017	1.623	4.13	1.087	1.283	0.889	0.169801	0.603289	0.0406253	0.0166369	0.0803946	0.0986102	0.0581907	5.4	8.14	18.8	25.98	5.88	4.84	2.85	68	57.4	65.3	107.5	280.7	73.9	91.3	56	17.39	23.07	12.94	7.07	17.96	13.32	5.95	17.22	66
	XP_011529873.1
	XP_011529873.1
	XP_011529873.1
	XP_011529873.1
High	NP_001293101.1	ADH4	NP_001293101.1#ADH4#127#alcohol dehydrogenase 4 isoform 1 [Homo sapiens]#NP_001293100.1#ADH4#127#alcohol dehydrogenase 4 isoform 1 [Homo sapiens]	11	24	4	399	42.6	7.91	95.04	4	0.497	9.868	2.15	0.49	0.5	0.467	0.429	0.0175461	0.00173542	0.00264948	0.00400932	0.0044353	0.00705162	0.00602804	3.12	9.63	5.17	0.89	1.87	1.36	0.62	52	25.8	512.7	111.7	25.4	26	24.3	22.1	6.16	23.11	5.32	4.48	12.88	13.7	15.37	18.42	52
	NP_001293101.1
	NP_001293101.1
	NP_001293101.1
	NP_001293101.1
High	XP_011541100.1	HSPA8	XP_011541100.1#HSPA8#3312#heat shock cognate 71 kDa protein isoform X1 [Homo sapiens]#NP_006588.1#HSPA8#3312#heat shock cognate 71 kDa protein isoform 1 [Homo sapiens]	18	38	6	646	70.9	5.52	163.75	8	0.712	1.162	1.067	1.588	1.588	1.726	2.27	0.0130386	0.295382	0.507105	0.00204532	0.00261612	0.00355658	0.00165429	2.96	22.42	20	2.78	2.37	3.58	2.89	72	51.3	83.7	76.9	113.4	114.9	124.3	163.5	3.13	5.11	17.88	15.34	1.37	3.13	5.93	6.43	69
	XP_011541100.1
	XP_011541100.1
	XP_011541100.1
	XP_011541100.1
	XP_011541100.1
	XP_011541100.1
High	NP_066953.1	PPIA	NP_066953.1#PPIA#5478#peptidyl-prolyl cis-trans isomerase A isoform 1 [Homo sapiens]	22	33	4	165	18	7.81	117.82	4	0.733	0.908	1.3	1.778	1.747	1.446	2.435	0.158221	0.306322	0.0238013	0.0157277	0.0385022	0.0381532	0.0179658	4.57	4.38	5.61	11.38	17.04	15.18	21.9	70.4	51.6	65.1	91.5	125.2	123	101.8	171.4	10.22	33.27	7.36	16.44	3.49	10.75	3.57	13.78	72.7
	NP_066953.1
	NP_066953.1
	NP_066953.1
	NP_066953.1
	NP_066953.1
	NP_066953.1
High	NP_003121.1	SRI	NP_003121.1#SRI#6717#sorcin isoform A [Homo sapiens]	12	7	3	198	21.7	5.59	16.31	3	0.868	0.753	1.011	0.828	2.38	2.394	0.941	0.414773	0.075695	0.999347	0.0464027	0.00877065	0.0237965	0.360684	11.4	7.75	23.08	6.5	8.75	30.56	9.55	80.1	67.3	58.3	78.4	64.2	190.7	185.6	75.4	8.82	20.96	19.47	22.05	12.85	7.95	19.25	16.69	68.9
	NP_003121.1
	NP_003121.1
	NP_003121.1
High	NP_000660.1	ADH1C	NP_000660.1#ADH1C#126#alcohol dehydrogenase 1C [Homo sapiens]	7	9	2	375	39.8	8.29	42.88	2	0.809	4.096	1.362	0.486	0.656	0.627	0.448	0.0745606	0.0515797	0.0511107	0.0417932	0.0734968	0.0207808	0.0460114	7.87	32.13	15.04	6.17	10.85	3.63	6.08	87.1	67.7	348.1	115.9	36.3	49	58	38	18.89	12.89	32.57	9.08	43.94	34.54	19.14	49.84	100.2
	NP_000660.1
	NP_000660.1
High	XP_024305924.1	COX4I1	XP_024305924.1#COX4I1#1327#cytochrome c oxidase subunit 4 isoform 1, mitochondrial isoform X1 [Homo sapiens]	11	8	2	175	20.1	9.6	31.02	2	0.712	1.593	1.013	2.687	1.265	0.843	1.012	0.0689088	0.035699	0.581336	0.00954101	0.0476635	0.0501507	0.434932	7.25	18.97	9.24	21.06	11.85	4.32	3.48	79.1	57	127.4	79	211.2	100.1	65.4	80.9	6.96	22.5	12.91	21.59	11.29	5.16	9.82	11.23	84
	XP_024305924.1
	XP_024305924.1
High	XP_024307176.1	ECH1	XP_024307176.1#ECH1#1891#delta(3,5)-Delta(2,4)-dienoyl-CoA isomerase, mitochondrial isoform X1 [Homo sapiens]	16	21	5	390	42.1	7.66	96.85	5	0.934	1.796	1.434	1.135	2.459	0.993	0.957	0.16952	0.00742987	0.0629171	0.294029	0.0133202	0.740913	0.450706	6.71	4.32	10.93	5.02	22.19	5.18	8.96	74.6	69.5	140.2	106.8	81.4	183.4	73.5	70.7	8.77	13.73	5.6	12.09	6.05	11.21	6.55	5.19	73.9
	XP_024307176.1
	XP_024307176.1
	XP_024307176.1
	XP_024307176.1
	XP_024307176.1
	XP_024307176.1
High	NP_001435.1	FABP5	NP_001435.1#FABP5#2171#fatty acid-binding protein 5 [Homo sapiens]	24	8	3	135	15.2	7.01	26.11	3	0.895	0.545	1.464	0.827	1.438	1.035	8.795	0.303224	0.00733173	0.407823	0.120426	0.0408813	0.433373	0.00522279	14.75	2.45	29.72	8.56	11.65	7.21	22.81	50.3	45	28.4	68.7	43.6	72.3	49.5	442.2	17.66	33.44	13.03	27.88	12.55	4.3	28.06	8.94	48.4
	NP_001435.1
	NP_001435.1
	NP_001435.1
High	NP_001491.1	GMDS	NP_001491.1#GMDS#2762#GDP-mannose 4,6 dehydratase isoform 1 [Homo sapiens]	13	10	4	372	41.9	7.31	36.61	4	1.033	0.937	1.398	3.061	0.816	0.937	0.853	0.655299	0.631441	0.265541	0.0315148	0.327765	0.534655	0.338075	18.16	23.22	38.8	21.98	13.6	17.08	17.36	75.7	86.2	71	105.6	263.5	61.7	71.9	64.4	13.7	14.24	16.58	38.34	32.78	19.76	11.25	18.3	74.4
	NP_001491.1
	NP_001491.1
	NP_001491.1
	NP_001491.1
High	NP_001017963.2	HSP90AA1	NP_001017963.2#HSP90AA1#3320#heat shock protein HSP 90-alpha isoform 1 [Homo sapiens]	8	30	5	854	98.1	5.16	129.19	7	0.743	0.976	1.611	1.744	2.088	1.139	1.574	0.0433056	0.825079	0.00849542	0.0290579	0.0215409	0.323186	0.0527914	6	15.43	4.66	9.84	11.74	14.84	12.79	73.5	54.6	69.9	118.4	130.5	153.8	83.7	115.6	16.34	5.34	24.76	10.62	5.27	7.69	7.46	9.02	83.6
	NP_001017963.2
	NP_001017963.2
	NP_001017963.2
	NP_001017963.2
	NP_001017963.2
High	XP_024302189.1	HSP90AB1	XP_024302189.1#HSP90AB1#3326#heat shock protein HSP 90-beta isoform X1 [Homo sapiens]#NP_001258899.1#HSP90AB1#3326#heat shock protein HSP 90-beta isoform a [Homo sapiens]#NP_001258898.1#HSP90AB1#3326#heat shock protein HSP 90-beta isoform a [Homo sapiens]#NP_031381.2#HSP90AB1#3326#heat shock protein HSP 90-beta isoform a [Homo sapiens]	12	31	5	724	83.2	5.03	133.01	8	0.802	0.858	1.903	2.421	1.8	1.345	2.728	0.0671547	0.0878245	0.00815587	0.00274736	0.00310194	0.00766126	0.00165429	3.97	7.06	8.57	7.44	4.45	5.29	4.38	62.2	49.3	52.8	120.2	150.4	113.1	83.7	168.2	4.61	10.79	5.52	6.92	2.47	1.42	1.33	3.05	65.4
	XP_024302189.1
	XP_024302189.1
	XP_024302189.1
	XP_024302189.1
	XP_024302189.1
High	NP_002159.2	IDH2	NP_002159.2#IDH2#3418#isocitrate dehydrogenase [NADP], mitochondrial isoform 1 precursor [Homo sapiens]	17	15	6	452	50.9	8.69	55.92	7	1.011	1.722	1.231	2.148	1.31	0.744	1.181	0.911351	0.0264103	0.0381047	0.0121696	0.0215409	0.0473867	0.0749802	7.15	13.99	8.49	6.68	5.82	1.27	7.3	78.2	79.1	129.7	96.6	163.7	103.8	56	93	4.22	11.96	20.21	4.84	13.72	4.95	13.23	8.09	80.6
	NP_002159.2
	NP_002159.2
	NP_002159.2
	NP_002159.2
	NP_002159.2
	NP_002159.2
High	NP_002622.2	PGD	NP_002622.2#PGD#5226#6-phosphogluconate dehydrogenase, decarboxylating isoform 1 [Homo sapiens]	12	13	3	483	53.1	7.23	62.24	3	1.811	0.967	1.04	1.27	1.084	1.132	2.052	0.0411469	0.883623	0.81464	0.136796	0.942666	0.511611	0.0248023	26.08	9.01	9.8	11.63	10.52	14.08	24.33	78.1	141.5	70.7	82.5	97	82.2	87.8	160.3	14.07	9.34	31.3	5.28	4.33	8.58	5.08	8.97	82.1
	NP_002622.2
	NP_002622.2
	NP_002622.2
High	NP_001193725.1	PKM	NP_001193725.1#PKM#5315#pyruvate kinase PKM isoform c [Homo sapiens]	12	31	7	605	65.9	7.87	147.33	7	0.9	0.599	1.345	2.065	1.333	1.416	1.94	0.339153	0.061105	0.0785788	0.00400932	0.0518668	0.0170121	0.0080979	10.68	6.49	14.1	1.4	10.64	1.48	12.11	73.9	68	45.3	102.2	148.4	104.1	110.6	147.5	5.69	9.22	21.32	16.18	3.38	15.26	8.03	10.95	76.2
	NP_001193725.1
	NP_001193725.1
	NP_001193725.1
	NP_001193725.1
	NP_001193725.1
	NP_001193725.1
	NP_001193725.1
High	NP_001022.1	RPS28	NP_001022.1#RPS28#6234#40S ribosomal protein S28 [Homo sapiens]	30	10	2	69	7.8	10.7	38.64	2	0.82	1.712	1.642	2.046	1.871	0.681	2.114	0.291714	0.0123773	0.0460482	0.0304672	0.0396274	0.200948	0.0267022	13.29	7.67	13.65	12.99	11.72	13.87	13.14	67	54.3	114.7	117.9	135.5	123.9	45.6	141.2	22.26	26.14	10.59	6.61	3.19	2.86	30.52	3.06	70
	NP_001022.1
	NP_001022.1
	NP_001022.1
High	NP_001244917.1	TYMP	NP_001244917.1#TYMP#1890#thymidine phosphorylase isoform 1 precursor [Homo sapiens]#NP_001107228.1#TYMP#1890#thymidine phosphorylase isoform 1 precursor [Homo sapiens]#NP_001107227.1#TYMP#1890#thymidine phosphorylase isoform 1 precursor [Homo sapiens]#NP_001944.1#TYMP#1890#thymidine phosphorylase isoform 1 precursor [Homo sapiens]	25	17	7	482	49.9	5.53	91.1	7	1.97	1.138	1.024	0.905	1.045	1.252	2.441	0.13674	0.0992563	0.831486	0.16119	0.415159	0.0624727	0.00958065	42.64	8.61	9.51	7.85	8.91	10.54	18.08	76.8	151.4	82.3	77.5	66.1	78.2	94.8	172.9	17.47	42.17	21.98	23.69	11.99	7.33	9.77	9.07	56
	NP_001244917.1
	NP_001244917.1
	NP_001244917.1
	NP_001244917.1
	NP_001244917.1
	NP_001244917.1
	NP_001244917.1
High	NP_001145.1	ANXA5	NP_001145.1#ANXA5#308#annexin A5 [Homo sapiens]	36	53	9	320	35.9	5.05	254.45	9	0.76	0.4	0.522	1.598	1.166	2.749	1.145	0.0149204	0.00445063	0.00720695	0.0102941	0.0642356	0.00705162	0.099062	3.71	1.45	2.14	5.88	5.49	4.06	7	85.5	66.2	35	45.8	136.6	100	232.9	97.9	7.45	4.97	5.28	3.58	1.6	0.8	3.83	1.12	88.1
	NP_001145.1
	NP_001145.1
	NP_001145.1
	NP_001145.1
	NP_001145.1
	NP_001145.1
	NP_001145.1
	NP_001145.1
	NP_001145.1
	NP_001145.1
High	XP_024304524.1	SERPINH1	XP_024304524.1#SERPINH1#871#serpin H1 isoform X1 [Homo sapiens]#XP_011543629.1#SERPINH1#871#serpin H1 isoform X1 [Homo sapiens]#NP_001226.2#SERPINH1#871#serpin H1 precursor [Homo sapiens]#NP_001193943.1#SERPINH1#871#serpin H1 precursor [Homo sapiens]	12	14	4	418	46.4	8.69	52.6	4	0.988	0.881	1.269	1.046	1.45	1.061	2.587	0.843888	0.222894	0.203752	0.523968	0.0397541	0.433121	0.0222251	2.13	10.57	17.41	7.34	11.96	12.45	25.91	79.5	77.3	65.3	101.4	81.6	107.7	81.7	205.5	13.52	9.52	15.05	18.23	13.34	8.66	5.86	18.56	86.5
	XP_024304524.1
	XP_024304524.1
	XP_024304524.1
	XP_024304524.1
High	XP_005249638.1	AGR2	XP_005249638.1#AGR2#10551#anterior gradient protein 2 homolog isoform X1 [Homo sapiens]#NP_006399.1#AGR2#10551#anterior gradient protein 2 homolog precursor [Homo sapiens]	23	16	3	175	20	9	54.87	3	0.99	0.53	1.998	1.582	4.208	1.685	0.712	0.882713	0.0191927	0.0299225	0.0794442	0.0217998	0.0963461	0.0120472	25.08	5.6	21.46	23.12	12.98	19.79	2.23	63.5	57.6	36.5	113.3	96.6	277.3	108.5	46.5	28.11	18.99	34.77	19.49	8.45	19.43	9.07	33.04	70.9
	XP_005249638.1
	XP_005249638.1
	XP_005249638.1
	XP_005249638.1
High	NP_006296.1	ANP32A	NP_006296.1#ANP32A#8125#acidic leucine-rich nuclear phosphoprotein 32 family member A [Homo sapiens]	12	10	3	249	28.6	4.09	45.48	3	0.845	0.808	1.534	2.3	1.439	1.214	1.219	0.183553	0.0359528	0.0551931	0.0271309	0.0294284	0.184874	0.065019	13.57	3.86	20.45	27.14	10.31	8.91	8.42	76.3	65.2	61.4	115.4	182.1	112.7	90.4	96.5	5.62	18.18	7.88	18.98	22.82	10.74	31.48	10.81	79.4
	NP_006296.1
	NP_006296.1
	NP_006296.1
High	XP_011523721.1	AOC3	XP_011523721.1#AOC3#8639#membrane primary amine oxidase isoform X1 [Homo sapiens]	10	15	5	794	88	6.61	88.62	5	0.559	0.749	0.856	0.507	0.733	0.703	0.485	0.0565515	0.0589647	0.966259	0.0282536	0.0653187	0.0266392	0.0114419	4.63	5.71	52.61	3.26	9.05	5.78	2.6	147.7	85	104.7	126.4	63.5	103.2	101.7	67.8	24.59	6.88	14.85	69.79	18.45	28.04	29.35	20.08	141.8
	XP_011523721.1
	XP_011523721.1
	XP_011523721.1
	XP_011523721.1
	XP_011523721.1
High	NP_000080.2	COL1A2	NP_000080.2#COL1A2#1278#collagen alpha-2(I) chain precursor [Homo sapiens]	2	12	2	1366	129.2	8.95	61.22	2	0.677	0.654	0.623	0.52	0.486	0.563	0.621	0.137387	0.0243655	0.0695633	0.0966984	0.0305263	0.0274919	0.0562697	12.12	5.51	6.31	11.91	6.72	5.88	9.11	157.2	106.5	102.9	88.1	81.7	76.1	90	97.6	20.82	10.11	8.67	14.8	24.91	7.59	3.98	6.06	204.8
	NP_000080.2
	NP_000080.2
High	XP_011531105.1	HADHB	XP_011531105.1#HADHB#3032#trifunctional enzyme subunit beta, mitochondrial isoform X1 [Homo sapiens]#NP_000174.1#HADHB#3032#trifunctional enzyme subunit beta, mitochondrial isoform 1 precursor [Homo sapiens]	11	18	5	474	51.3	9.41	62.76	5	0.988	1.565	1.457	2.118	1.514	0.995	1.093	0.962793	0.057267	0.0480443	0.0278718	0.0993502	0.537416	0.169683	6.96	15.51	16.47	14.74	12.48	3.69	10.52	73.5	75.8	112.5	117.4	155.8	111.3	73.2	80.4	14.32	13.67	6.57	9.86	8.81	9.66	6.96	8.42	76.8
	XP_011531105.1
	XP_011531105.1
	XP_011531105.1
	XP_011531105.1
	XP_011531105.1
	XP_011531105.1
High	NP_000933.1	PPIB	NP_000933.1#PPIB#5479#peptidyl-prolyl cis-trans isomerase B precursor [Homo sapiens]	13	14	3	216	23.7	9.41	49.5	3	0.746	1.261	1.31	1.577	1.066	1.279	2.299	0.0364771	0.136799	0.0203552	0.0154455	0.822805	0.0145481	0.0080014	5.97	16.07	5.41	6.55	4.98	6.05	6.46	75.5	57.6	95.2	102.5	119	79.6	97	173.6	8.46	11.86	8.96	11.1	1.99	3.83	3.99	5.98	77.9
	NP_000933.1
	NP_000933.1
	NP_000933.1
High	NP_004376.2	VCAN	NP_004376.2#VCAN#1462#versican core protein isoform 1 precursor [Homo sapiens]	1	10	2	3396	372.6	4.51	39.67	2	0.626	0.725	0.895	0.69	1.059	3.567	0.807	0.0199061	0.128699	0.962279	0.247566	0.279072	0.0115613	0.11122	2.47	10.09	49.45	30.33	6.72	22.53	11.75	89.2	52.4	60.3	82.3	57.4	93.3	296.8	68.4	10.42	13.42	30.65	63.99	43.67	2.09	29.87	14.5	69.4
	NP_004376.2
	NP_004376.2
	NP_004376.2
High	NP_003699.3	RDH16	NP_003699.3#RDH16#8608#retinol dehydrogenase 16 isoform 1 [Homo sapiens]	5	8	2	317	35.7	8.6	22.96	2	0.53	3.574	3.544	0.683	0.49	0.389	0.498	0.00773174	0.011886	0.207196	0.109466	0.0128744	0.00697801	0.00151116	2.34	8.86	104.09	8.84	2.48	1.38	0.4	73.8	41.2	274.9	261.4	47.4	36.4	28.7	36.2	40.92	33.23	18.55	53.63	8.02	22.17	50.45	42.69	59.9
	NP_003699.3
	NP_003699.3
High	NP_001065.2	UGT2B7	NP_001065.2#UGT2B7#7364#UDP-glucuronosyltransferase 2B7 isoform 1 precursor [Homo sapiens]	3	9	2	529	60.7	8.31	27.65	2	0.492	3.624	1.335	0.684	0.492	0.382	0.367	0.260118	0.0138842	0.0318544	0.100377	0.0044353	0.115894	0.0132491	3.39	31.47	9.5	11.98	1.71	1.57	1.57	90.4	44.4	360.8	126.8	61.8	45.2	36.7	33.7	12.4	67.2	24.99	8.57	37.73	18.12	60.38	22.29	102.9
	NP_001065.2
	NP_001065.2
High	NP_000031.1	APOC3	NP_000031.1#APOC3#345#apolipoprotein C-III precursor [Homo sapiens]	35	11	2	99	10.8	5.41	67.04	2	0.68	1.408	0.466	0.165	0.158	0.109	0.245	0.0548439	0.00973879	0.137289	0.0317473	0.0342822	0.0490461	0.0222251	1.58	7.43	12.05	1.23	1.18	0.82	1.28	188.8	129.6	265.8	87.9	31.1	29.9	20.5	46.3	18.07	6.3	21.79	36.14	44.64	50.83	74.65	23.92	202.2
	NP_000031.1
	NP_000031.1
High	NP_001002858.1	ANXA2	NP_001002858.1#ANXA2#302#annexin A2 isoform 1 [Homo sapiens]	33	61	11	357	40.4	8.37	283.4	11	0.54	0.471	0.579	1.507	1.285	2.939	2.089	0.00143787	0.00867946	0.0183482	0.00987151	0.00352355	0.00337292	0.00196305	0.74	3.29	1.24	5.3	0.96	3.17	3.77	77	42.1	36.9	44.5	114.6	98.5	226.9	159.4	2.59	1.94	10.46	11.95	5.35	0.7	4.88	3.21	77
	NP_001002858.1
	NP_001002858.1
	NP_001002858.1
	NP_001002858.1
	NP_001002858.1
	NP_001002858.1
	NP_001002858.1
	NP_001002858.1
	NP_001002858.1
	NP_001002858.1
	NP_001002858.1
High	XP_005249786.1	HNRNPA2B1	XP_005249786.1#HNRNPA2B1#3181#heterogeneous nuclear ribonucleoproteins A2/B1 isoform X1 [Homo sapiens]#NP_112533.1#HNRNPA2B1#3181#heterogeneous nuclear ribonucleoproteins A2/B1 isoform B1 [Homo sapiens]	22	27	7	353	37.4	8.95	125.72	7	0.523	0.831	1.256	2.594	2.939	0.807	2.714	0.0325817	0.112591	0.194495	0.0156928	0.0125291	0.0986102	0.0146325	5.49	6.94	14.77	22.92	23.18	7.92	28.49	63	30.9	53.7	78.9	164.6	185.3	52	171.6	19.98	22.61	7.47	1.67	3.41	3.81	5.79	6.48	83.6
	XP_005249786.1
	XP_005249786.1
	XP_005249786.1
	XP_005249786.1
	XP_005249786.1
	XP_005249786.1
	XP_005249786.1
High	NP_570602.2	A1BG	NP_570602.2#A1BG#1#alpha-1B-glycoprotein precursor [Homo sapiens]	20	23	7	495	54.2	5.86	87.16	7	1.296	0.538	0.51	0.447	0.581	0.883	0.734	0.028384	0.012139	0.0387779	0.00637701	0.00927449	0.0469623	0.00800755	6.24	2.15	5.22	0.86	2.36	1.28	2.64	133.8	180.3	70	66.4	58.9	75.6	115.2	99.8	5.89	7.8	9.06	21.64	6.68	7.36	9.67	2	146
	NP_570602.2
	NP_570602.2
	NP_570602.2
	NP_570602.2
	NP_570602.2
	NP_570602.2
	NP_570602.2
High	XP_005268883.1	HNRNPA1	XP_005268883.1#HNRNPA1#3178#heterogeneous nuclear ribonucleoprotein A1 isoform X1 [Homo sapiens]#NP_112420.1#HNRNPA1#3178#heterogeneous nuclear ribonucleoprotein A1 isoform b [Homo sapiens]	11	17	3	372	38.7	9.13	84.76	3	0.618	0.813	1.613	3.609	3.282	1.135	2.16	0.00962836	0.207086	0.168139	0.00672594	0.0079562	0.120491	0.00602804	1.79	9.3	23.88	19.25	19.34	11.25	9.22	57	34.1	46.6	87.2	208	189.2	61.3	116.5	12.48	19.32	28.49	21.14	7.1	7.86	16.42	5.94	52.8
	XP_005268883.1
	XP_005268883.1
	XP_005268883.1
High	NP_004125.3	HSPA9	NP_004125.3#HSPA9#3313#stress-70 protein, mitochondrial precursor [Homo sapiens]	15	43	8	679	73.6	6.16	195.47	8	0.796	1.664	1.656	3.183	2.044	1.037	2.357	0.121279	0.0295903	0.0788442	0.00812035	0.0184166	0.841794	0.0082509	12.05	14.8	22.36	16.35	15.02	4.64	14.56	58.9	45.2	95	97.6	187.5	117.4	59	139.5	16.63	21.18	3.28	11.47	3.14	3.82	6.14	0.59	72.8
	NP_004125.3
	NP_004125.3
	NP_004125.3
	NP_004125.3
	NP_004125.3
	NP_004125.3
	NP_004125.3
	NP_004125.3
High	NP_005909.2	MDH2	NP_005909.2#MDH2#4191#malate dehydrogenase, mitochondrial isoform 1 precursor [Homo sapiens]	18	31	5	338	35.5	8.68	129.83	5	0.797	1.519	1.651	3.556	2.404	1.465	1.694	0.0359537	0.00861008	0.00556296	0.0025975	0.00273276	0.00355658	0.00541785	5.53	5.31	4.51	7.77	6.77	1.95	5.67	56.7	44.1	86.5	95.8	201.7	136.5	83.1	95.6	4.46	12.39	3.1	7.49	3.95	2.88	2.34	2.28	56.2
	NP_005909.2
	NP_005909.2
	NP_005909.2
	NP_005909.2
	NP_005909.2
High	NP_005879.1	SLC25A3	NP_005879.1#SLC25A3#5250#phosphate carrier protein, mitochondrial isoform a precursor [Homo sapiens]	6	7	2	362	40.1	9.38	23.17	2	0.975	1.608	2.098	2.371	1.585	0.895	1.314	0.296989	0.0151661	0.129308	0.0134132	0.0388136	0.0501649	0.0617016	3.32	15.6	46.37	19.86	21.59	3.92	17.78	67.4	66.5	109.2	141.5	158.2	106.9	61.6	88.6	16.18	18.08	5.01	31.5	8.01	7.11	13.73	2.65	57.9
	NP_005879.1
	NP_005879.1
High	NP_003312.3	TUFM	NP_003312.3#TUFM#7284#elongation factor Tu, mitochondrial isoform 1 precursor [Homo sapiens]	21	27	8	455	49.8	7.61	107.39	8	0.975	0.828	1.582	3.457	1.009	0.803	1.609	0.598602	0.129447	0.125384	0.00944269	0.621409	0.0257542	0.0880549	7.92	3.6	29.84	22.76	9.63	4.54	26.57	72.6	70.8	55.3	114.9	246.9	69.3	56.4	113.8	14.42	50.79	12.38	22.16	8.44	12.81	18.37	13.21	60.5
	NP_003312.3
	NP_003312.3
	NP_003312.3
	NP_003312.3
	NP_003312.3
	NP_003312.3
	NP_003312.3
	NP_003312.3
High	XP_024303862.1	ALDH18A1	XP_024303862.1#ALDH18A1#5832#delta-1-pyrroline-5-carboxylate synthase isoform X1 [Homo sapiens]#XP_024303863.1#ALDH18A1#5832#delta-1-pyrroline-5-carboxylate synthase isoform X1 [Homo sapiens]	7	13	5	829	91.1	7.06	43.46	5	1.126	0.867	1.471	3.227	1.416	0.927	1.246	0.465736	0.146503	0.0183482	0.0272806	0.0321245	0.249818	0.120462	8.1	8.48	10.86	32.5	1.63	7.36	3.09	74.7	73.1	59	102	240.9	106.6	60.8	82.8	13.29	18.29	21.07	11.59	26.32	1.72	15.69	13.91	75.6
	XP_024303862.1
	XP_024303862.1
	XP_024303862.1
	XP_024303862.1
	XP_024303862.1
High	NP_001308855.1	CKMT1A	NP_001308855.1#CKMT1A#548596#creatine kinase U-type, mitochondrial isoform 1 precursor [Homo sapiens]#NP_001015001.1#CKMT1A#548596#creatine kinase U-type, mitochondrial isoform 1 precursor [Homo sapiens]#NP_066270.1#CKMT1B#1159#creatine kinase U-type, mitochondrial precursor [Homo sapiens]#XP_011519499.1#CKMT1B#1159#creatine kinase U-type, mitochondrial isoform X2 [Homo sapiens]	18	21	4	417	47	8.34	107.44	4	1.163	0.786	1.367	3.211	1.695	1.445	1.014	0.384278	0.180577	0.139912	0.00193591	0.00877065	0.00705162	0.862989	25.52	5.46	19.23	5.22	10.27	3.76	3.43	67.9	80.1	54.9	91.2	221.9	114.5	100.7	68.8	3.9	25.64	19.04	21.93	5.19	12.2	3.79	9.14	68.9
	NP_001308855.1
	NP_001308855.1
	NP_001308855.1
	NP_001308855.1
	NP_001308855.1
High	NP_004246.2	COX5A	NP_004246.2#COX5A#9377#cytochrome c oxidase subunit 5A, mitochondrial precursor [Homo sapiens]	11	6	2	150	16.8	6.79	15.69	2	0.652	1.782	1.321	2.817	1.397	0.894	1.006	0.0574542	0.0133804	0.168831	0.00600365	0.0338967	0.0624727	0.684741	6.98	15.85	22.97	12.4	13.94	2.68	6.14	72.4	50.2	132.5	95.7	203.6	102.9	65.4	77.2	10.18	25.41	6.55	19.52	4.01	4.13	6.6	6.47	84.3
	NP_004246.2
	NP_004246.2
High	NP_001854.1	COX6B1	NP_001854.1#COX6B1#1340#cytochrome c oxidase subunit 6B1 [Homo sapiens]	44	14	3	86	10.2	7.05	62.34	3	0.891	1.431	1.406	2.289	1.047	1.14	0.977	0.140566	0.00511677	0.019806	0.00389557	0.18172	0.049322	0.353573	4.72	0.53	3.66	6.39	5.33	2.38	4.61	78.9	71	112.8	113.1	180.6	81.3	87.2	75.1	4.82	3.78	2.17	5.56	3.13	2.75	3.51	4.1	78.4
	NP_001854.1
	NP_001854.1
	NP_001854.1
High	NP_001627.2	SLC25A6	NP_001627.2#SLC25A6#293#ADP/ATP translocase 3 [Homo sapiens]	27	20	3	298	32.8	9.74	93.64	7	1.247	1.422	1.776	2.021	1.701	0.95	1.43	0.0803417	0.123628	0.0095014	0.0445292	0.120282	0.357085	0.177904	9.41	26.11	6.53	20.36	17.5	7.61	40.41	70.3	84.4	95.3	122.2	146.9	113.5	63.7	103.9	18.27	14.81	15.87	10.68	21.03	19.77	26.56	20.59	76.9
	NP_001627.2
	NP_001627.2
	NP_001627.2
High	NP_001317178.1	HNRNPA3	NP_001317178.1#HNRNPA3#220988#heterogeneous nuclear ribonucleoprotein A3 isoform a [Homo sapiens]#NP_919223.1#HNRNPA3#220988#heterogeneous nuclear ribonucleoprotein A3 isoform a [Homo sapiens]	16	19	5	378	39.6	9.01	83.32	5	0.699	0.659	1.356	1.376	3.393	0.672	2.36	0.139523	0.00927803	0.067324	0.0762641	0.00985911	0.0107797	0.0118194	1.48	2.95	12.31	7.19	10.56	2.25	5.5	68.2	53.8	48.1	95.3	94.4	231.2	48.1	160.8	14.55	23.46	10.28	5.28	2.6	8.3	10.43	4.97	66.3
	NP_001317178.1
	NP_001317178.1
	NP_001317178.1
	NP_001317178.1
	NP_001317178.1
[truncated: 109 more columns]

## Sheet: Supplementary Table S3
Supplementary Table S3 Bioinformatic analysis of 58 DEPs in LN positive GBC using STRING databse. (A) Top 10 Molecular Functions (B) Top 10 reactome pathways
(A) Top 10 Molecular Functions
Term Description	Observed gene count	background gene count	Strength	False discovery rate	Matching proteins in your network (labels)
RNA binding	24	1649	0.69	4.45e-08	APEX1,LRPPRC,NPM1,HSPA9,PPIB,PKM,TUFM,HADHB,MDH2,HSP90AA1,EEF1A1,HNRNPA1,ANXA2,HNRNPA2B1,ALDH18A1,HSP90AB1,HNRNPK,HNRNPA3,ANP32A,PPIA,HSPA8,SERPINH1,VIM,RPS28
Unfolded protein binding	8	108	1.4	2.83e-06	NPM1,HSPA9,PPIB,HSP90AA1,HSP90AB1,PPIA,HSPA8,SERPINH1
Oxidoreductase activity, acting on the CH-OH group of donors, NAD or NADP as acceptor	7	122	1.29	0.00011	ADH4,PGD,HADHB,MDH2,IDH2,RDH16,ADH1C
Oxidoreductase activity	13	726	0.78	0.00013	APEX1,COX6B1,ADH4,PGD,AOC3,COX5A,HADHB,MDH2,IDH2,ALDH18A1,RDH16,ADH1C,COX4I1
MHC class II protein complex binding	4	16	1.93	0.00017	PKM,HSP90AA1,HSP90AB1,HSPA8
Identical protein binding	18	1896	0.51	0.0024	SRI,NPM1,FABP5,COL1A2,AOC3,PKM,HSP90AA1,HNRNPA1,ANXA2,HNRNPA2B1,ALDH18A1,HSP90AB1,HNRNPK,GMDS,TYMP,RDH16,AGR2,VIM
Cadherin binding	8	334	0.91	0.0025	CAPG,PKM,LASP1,ANXA2,TAGLN2,HSP90AB1,HNRNPK,HSPA8
Lipase inhibitor activity	3	17	1.77	0.0087	APOC3,ANXA5,ANXA2
Retinol dehydrogenase activity	3	20	1.7	0.0122	ADH4,RDH16,ADH1C
Cytochrome-c oxidase activity	3	22	1.66	0.0145	COX6B1,COX5A,COX4I1
(B) Top 10 reactome pathways
Term description	Observed gene count	Background gene count	Strength	False discovery rate	Matching proteins in your network (labels)
Chaperone Mediated Autophagy	5	22	1.88	3.15e-05	HSP90AA1,EEF1A1,HSP90AB1,HSPA8,VIM
Metabolism	22	2089	0.55	5.83e-05	APOC3,COX6B1,LRPPRC,VCAN,ADH4,PGD,FABP5,UGT2B7,AOC3,COX5A,PKM,HADHB,MDH2,IDH2,HSP90AA1,DLST,ALDH18A1,HSP90AB1,TYMP,ADH1C,COX4I1,RPS28
The citric acid (TCA) cycle and respiratory electron transport	7	176	1.13	0.0008	COX6B1,LRPPRC,COX5A,MDH2,IDH2,DLST,COX4I1
Neutrophil degranulation	10	473	0.85	0.0008	KRT1,A1BG,FABP5,PKM,HSP90AA1,EEF1A1,ANXA2,HSP90AB1,PPIA,HSPA8
Gene and protein expression by JAK-STAT signaling after Interleukin-12 stimulation	4	37	1.56	0.0028	HSPA9,ANXA2,HNRNPA2B1,PPIA
Cellular response to heat stress	5	89	1.28	0.0031	HSPA9,HSP90AA1,EEF1A1,HSP90AB1,HSPA8
HSF1 activation	3	12	1.93	0.0034	HSP90AA1,EEF1A1,HSP90AB1
Attenuation phase	3	13	1.89	0.0034	HSP90AA1,HSP90AB1,HSPA8
Signaling by Retinoic Acid	4	43	1.5	0.0034	ADH4,FABP5,RDH16,ADH1C
Formation of the cornified envelope	5	127	1.12	0.008	KRT1,KRT17,KRT7,KRT19,KRT6A

## Sheet: Supplementary Table S4
Supplementary Table S4: Literature survey of 58 DEPs for their association with LN metastasis in cancer. A total of 6 proteins are reported in GBC, 33 proteins in other cancers and 19 were found to be novel to cancer with respect to LN metastasis.
Sr. No.	Gene Symbol	Protein Name	Localisation	Association with LN metastasis in cancer
				GBC	other cancers	Novel to cancer
1	A1BG	Alpha-1B-glycoprotein precursor	extracellular region	No	No	Yes
2	ADH1C	Alcohol dehydrogenase 1C	cytosol	No	Yes	No
3	ADH4	Alcohol dehydrogenase 4 isoform 1	cytosol	No	Yes	No
4	AGR2	Anterior gradient protein 2	endoplasmic reticulum	No	Yes	No
5	ALDH18A1	Delta-1-pyrroline-5-carboxylate synthase isoform X1	mitochondrion	No	Yes	No
6	ANP32A	Acidic leucine-rich nuclear phosphoprotein 32 family member A	endoplasmic reticulum	No	Yes	No
7	ANXA10	Annexin A10 isoform X1	cytosol	No	Yes	No
8	ANXA2	Annexin A2 isoform 1	endosome	No	Yes	No
9	ANXA5	Annexin A5	cytosol	No	Yes	No
10	AOC3	Membrane primary amine oxidase isoform X1	endoplasmic reticulum	No	Yes	No
11	APEX1	DNA-(apurinic or apyrimidinic site) lyase	cytoskeleton	No	Yes	No
12	APOC3	Apolipoprotein C-III precursor	endosome	No	No	Yes
13	CAPG	Macrophage-capping protein isoform X1	cytoskeleton	No	Yes	No
14	CKMT1A	Creatine kinase U-type, mitochondrial isoform 1 precursor	mitochondrion	No	No	Yes
15	COL1A2	Collagen alpha-2(I) chain precurso	endoplasmic reticulum	No	Yes	No
16	COX4I1	Cytochrome c oxidase subunit 4 isoform 1, mitochondrial isoform X1	cytosol	No	No	Yes
17	COX5A	Cytochrome c oxidase subunit 5A, mitochondrial precursor	mitochondrion	No	Yes	No
18	COX6B1	Cytochrome c oxidase subunit 6B1	mitochondrion	No	No	Yes
19	DLST	Dihydrolipoyllysine-residue succinyltransferase component of 2-oxoglutarate dehydrogenase complex, mitochondrial isoform 1 precursor	cytoskeleton	No	No	Yes
20	ECH1	Delta(3,5)-Delta(2,4)-dienoyl-coa isomerase, mitochondrial isoform X1	cytosol	No	Yes	No
21	EEF1A1	Elongation factor 1-alpha 1	cytoskeleton	No	Yes	No
22	FABP5	Fatty acid-binding protein 5	cytosol	No	Yes	No
23	GMDS	GDP-mannose 4,6 dehydratase isoform 1	cytosol	No	No	Yes
24	HADHB	Trifunctional enzyme subunit beta, mitochondrial isoform X1	endoplasmic reticulum	No	No	Yes
25	HNRNPA1	Heterogeneous nuclear ribonucleoprotein A1 isoform X1	extracellular region	No	Yes	No
26	HNRNPA2B1	Heterogeneous nuclear ribonucleoproteins A2/B1 isoform X1	nucleus	No	Yes	No
27	HNRNPA3	Heterogeneous nuclear ribonucleoprotein A3 isoform a	nucleus	No	Yes	No
28	HNRNPK	Heterogeneous nuclear ribonucleoprotein K isoform X1	cytoskeleton	No	Yes	No
29	HSP90AA1	Heat shock protein HSP 90-alpha isoform 1	cytosol	No	No	Yes
30	HSP90AB1	Heat shock protein HSP 90-beta isoform X1	cytosol	No	No	Yes
31	HSPA8	Heat shock cognate 71 kda protein isoform X1	cytosol	No	Yes	No
32	HSPA9	Stress-70 protein, mitochondrial precursor	extracellular region	No	Yes	No
33	IDH2	Isocitrate dehydrogenase [NADP], mitochondrial isoform 1 precursor	cytosol	No	Yes	No
34	KRT1	Keratin, type II cytoskeletal 1	cytoskeleton	No	Yes	No
35	KRT17	Keratin, type I cytoskeletal 17	cytoskeleton	No	Yes	No
36	KRT19	Keratin, type I cytoskeletal 19	cytoskeleton	Yes	Yes	No
37	KRT6A	Keratin, type II cytoskeletal 6A	cytoskeleton	No	Yes	No
38	KRT7	Keratin, type II cytoskeletal 7	cytoskeleton	Yes	Yes	No
39	LASP1	LIM and SH3 domain protein 1 isoform a	cytoskeleton	Yes	Yes	No
40	LRPPRC	Leucine-rich PPR motif-containing protein, mitochondrial precursor	cytoskeleton	No	Yes	No
41	MDH2	Malate dehydrogenase, mitochondrial isoform 1 precursor	extracellular region	No	No	Yes
42	NPM1	Nucleophosmin isoform 1	centrosome	No	Yes	No
43	PGD	6-phosphogluconate dehydrogenase, decarboxylating isoform 1	cytosol	No	No	Yes
44	PKM	Pyruvate kinase PKM isoform c	cytosol	Yes	Yes	No
45	PPIA	Peptidyl-prolyl cis-trans isomerase A isoform 1	cytosol	No	Yes	No
46	PPIB	Peptidyl-prolyl cis-trans isomerase B precursor	endoplasmic reticulum	No	Yes	No
47	RDH16	Retinol dehydrogenase 16 isoform 1	endoplasmic reticulum	No	No	Yes
48	RPS28	40S ribosomal protein S28	cytosol	No	No	Yes
49	SERPINH1	Serpin H1 isoform X1	endoplasmic reticulum	No	Yes	No
50	SLC25A3	Phosphate carrier protein, mitochondrial isoform a precursor	extracellular region	No	No	Yes
51	SLC25A6	ADP/ATP translocase 3	mitochondrion	No	No	Yes
52	SRI	Sorcin isoform A	cytosol	No	Yes	No
53	TAGLN2	Transgelin-2 isoform	cytoskeleton	No	Yes	No
54	TUFM	Elongation factor Tu, mitochondrial isoform 1 precursor	extracellular region	No	No	Yes
55	TYMP	Thymidine phosphorylase isoform 1 precursor	cytosol	Yes	Yes	No
56	UGT2B7	UDP-glucuronosyltransferase 2B7 isoform 1 precursor	endoplasmic reticulum	No	No	Yes
57	VCAN	Versican core protein isoform 1 precursor	endoplasmic reticulum	No	No	Yes
58	VIM	Vimentin	cytoskeleton	Yes	Yes	No
